# Supplementary material for: Crystal structure, lattice dynamics and superexchange in MAgF3 1D antiferromagnets (M = K, Rb, Cs) and a Rb3Ag2F7 Ruddlesden–Popper phase
Source: Royal Society of Chemistry journal article supplement (doi:10.1039/d1ce01545a), 2022-01-01
Supplement: d1ce01545a1.pdf [file d1ce01545a1.pdf]

## Electronic supplementary information

### Crystal structure, lattice dynamics and superexchange in $\text{M}\text{AgF}_3$ 1D antiferromagnets ( $\text{M} = \text{K}, \text{Rb}, \text{Cs}$ ) and $\text{Rb}_3\text{Ag}_2\text{F}_7$ Ruddlesden-Popper phase

Kacper Koteras,<sup>1\*</sup> Jakub Gawraczyński,<sup>1</sup> Gašper Tavčar,<sup>2</sup> Zoran Mazej,<sup>2</sup> Wojciech Grochala<sup>1</sup>

<sup>1</sup> Centre of New Technologies, University of Warsaw, S. Banacha 2C, 02-097 Warsaw, Poland

<sup>2</sup> Jožef Stefan Institute, Jamova cesta 39, 1000 Ljubljana, Slovenia

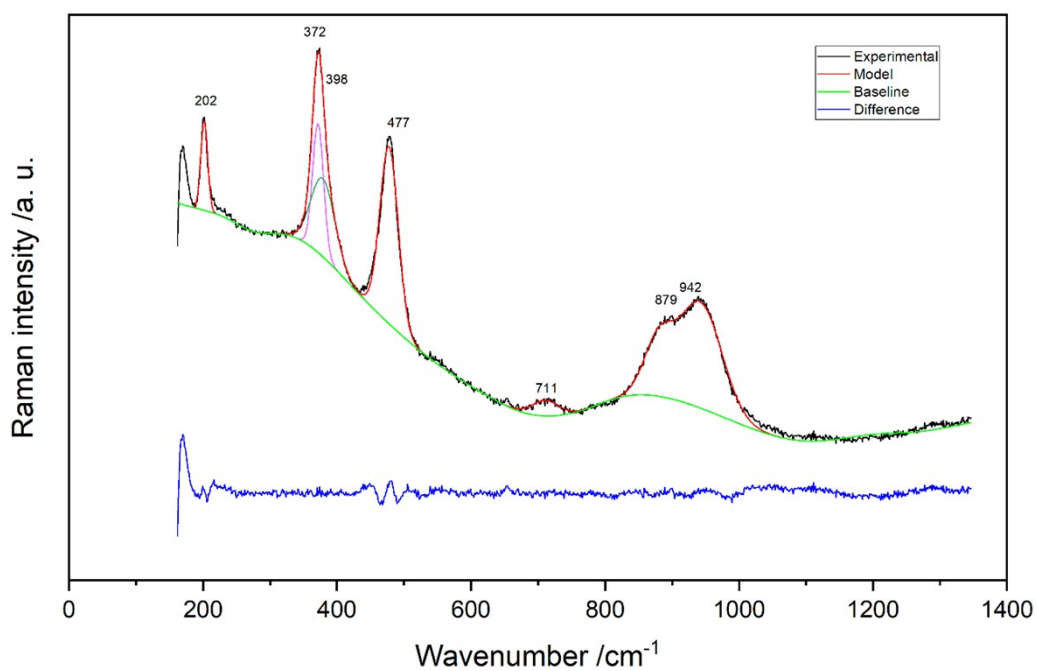

Figure S1. Deconvoluted Raman spectrum of  $\text{CsAgF}_3$ .

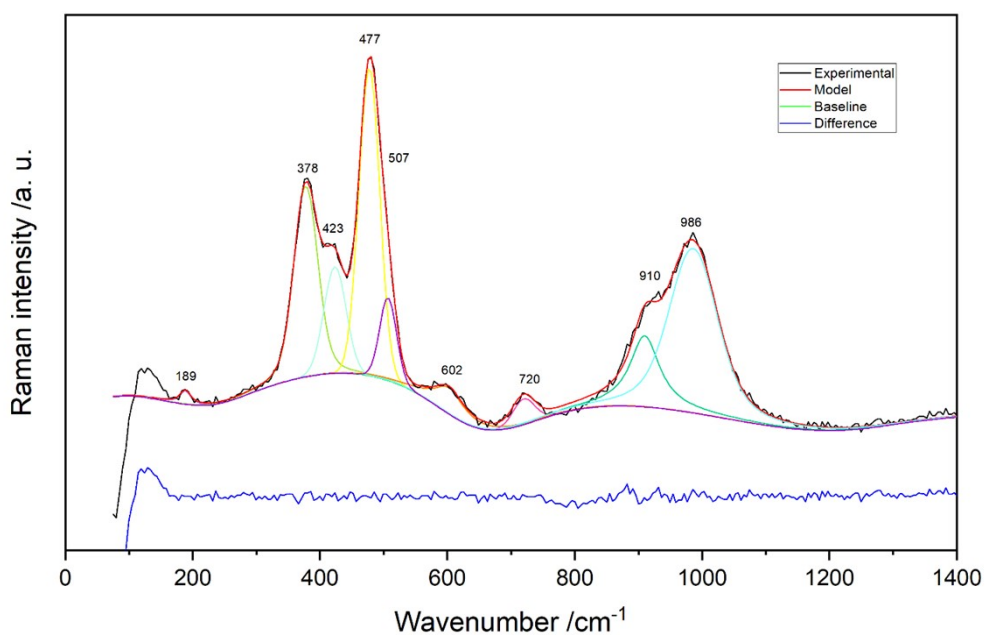

Figure S2. Deconvoluted Raman spectrum of  $\text{RbAgF}_3$ .

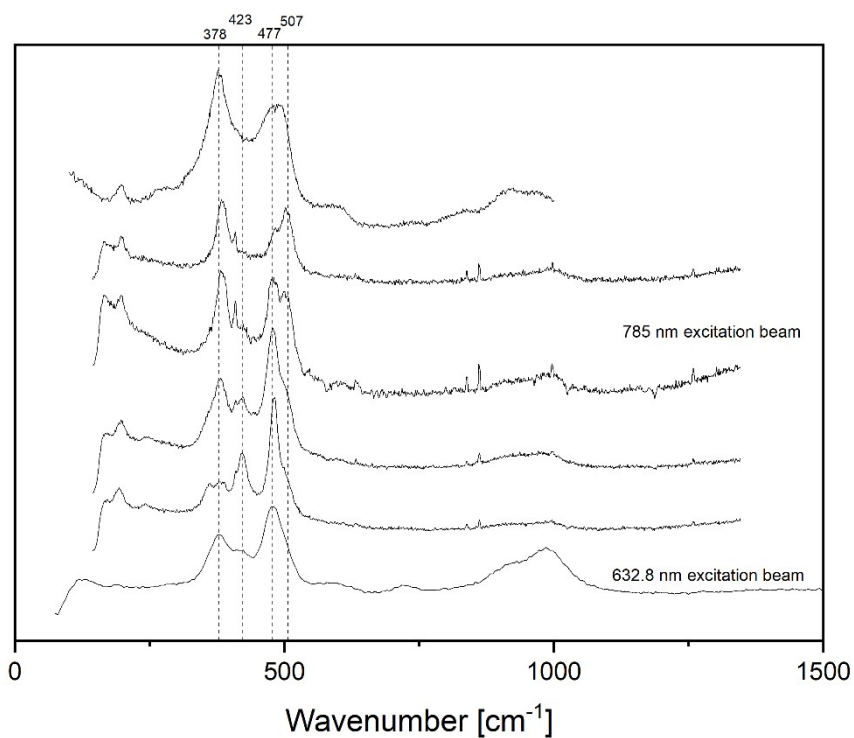

Figure S3. Different Raman spectra collected for of RbAgF<sub>3</sub>.

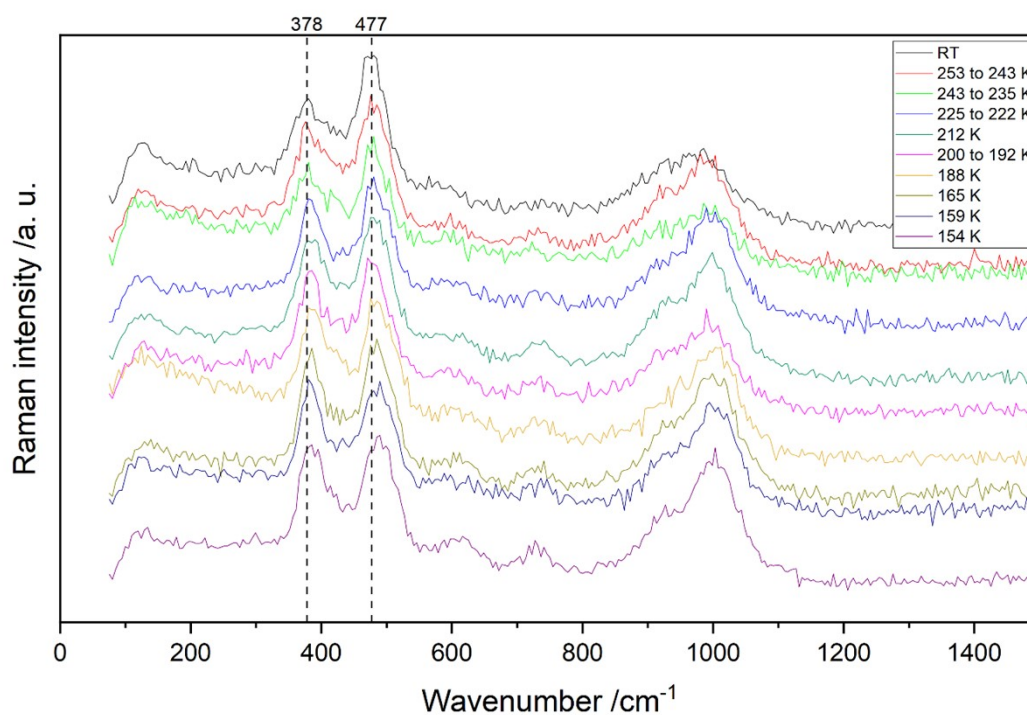

Figure S4. Full set of Raman spectra at low temperature for RbAgF<sub>3</sub>.

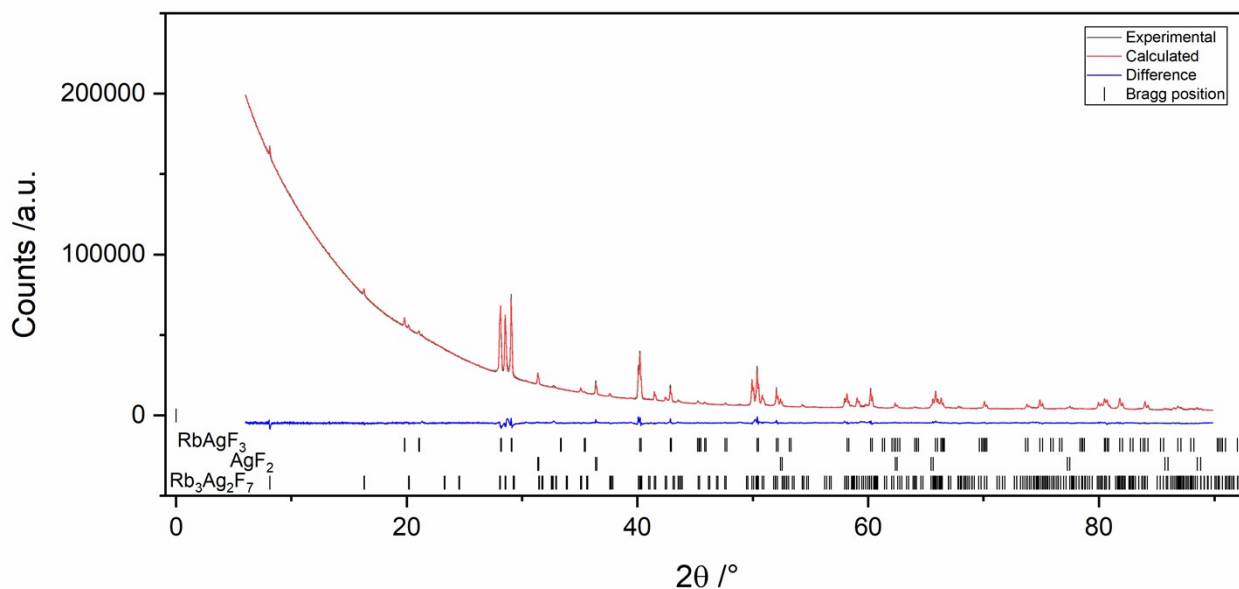

Figure S5. X-ray diffraction pattern of RbAgF<sub>3</sub> sample containing novel Rb<sub>3</sub>Ag<sub>2</sub>F<sub>7</sub> phase and the results of the Rietveld refinement. Bottom part shows simulated Bragg positions for each present phase (from top to bottom: RbAgF<sub>3</sub>, AgF and Rb<sub>3</sub>Ag<sub>2</sub>F<sub>7</sub>).

Table S1. Crystallographic data for RbAgF<sub>3</sub>.

|                     |                                                                                                                                                                                                                                                                        |
|---------------------|------------------------------------------------------------------------------------------------------------------------------------------------------------------------------------------------------------------------------------------------------------------------|
| Formula             | RbAgF <sub>3</sub>                                                                                                                                                                                                                                                     |
| Colour              | brown                                                                                                                                                                                                                                                                  |
| Space group         | <i>I4/mcm</i> (No. 140)                                                                                                                                                                                                                                                |
| Z                   | 4                                                                                                                                                                                                                                                                      |
| V /Å <sup>3</sup>   | 338.991(6)                                                                                                                                                                                                                                                             |
| a /Å                | 6.33855(6)                                                                                                                                                                                                                                                             |
| b /Å                | 6.33855(6)                                                                                                                                                                                                                                                             |
| c /Å                | 8.43740(11)                                                                                                                                                                                                                                                            |
| α /°                | 90                                                                                                                                                                                                                                                                     |
| β /°                | 90                                                                                                                                                                                                                                                                     |
| γ /°                | 90                                                                                                                                                                                                                                                                     |
| Positions           | Rb1 0.00000 0.00000 0.25000<br>Ag1 0.00000 0.50000 0.00000<br>F1 0.00000 0.50000 0.25000<br>F2 0.240(4) 0.740(4) 0.00000                                                                                                                                               |
| Reliability factors | Not corrected for background (all data)<br>R <sub>p</sub> = 0.84 %<br>R <sub>wp</sub> = 1.78 %<br><br>Corrected for background (all data)<br>cR <sub>p</sub> = 27.86 %<br>cR <sub>wp</sub> = 15.16 %<br><br>R Bragg factor (this phase)<br>R <sub>Bragg</sub> = 9.53 % |
| Atomic distances /Å | Ag–F (apical)<br>2.10935(3)<br><br>Ag–F (equatorial)<br>2.33(3)<br>2.15(3)                                                                                                                                                                                             |

Table S2. Theoretically calculated modes.

| RbAgF <sub>3</sub> <i>Pnma</i> (HSE06) |     | RbAgF <sub>3</sub> <i>I4/mcm</i> (HSE06) |     | CsAgF <sub>3</sub> <i>I4/mcm</i> (HSE06) |     |
|----------------------------------------|-----|------------------------------------------|-----|------------------------------------------|-----|
| B <sub>2u</sub>                        | 471 | A <sub>2u</sub>                          | 484 | E <sub>u</sub>                           | 450 |
| A <sub>u</sub>                         | 470 | B <sub>2g</sub>                          | 472 | B <sub>2g</sub>                          | 449 |
| B <sub>3g</sub>                        | 467 | E <sub>u</sub>                           | 467 | A <sub>2u</sub>                          | 449 |
| B <sub>1u</sub>                        | 464 | A <sub>1g</sub>                          | 381 | A <sub>1g</sub>                          | 370 |
| B <sub>3u</sub>                        | 464 | B <sub>2g</sub>                          | 312 | B <sub>2g</sub>                          | 302 |
| A <sub>u</sub>                         | 462 | B <sub>1u</sub>                          | 233 | B <sub>1u</sub>                          | 227 |
| B <sub>2u</sub>                        | 461 | E <sub>g</sub>                           | 184 | A <sub>2u</sub>                          | 193 |
| B <sub>2g</sub>                        | 449 | A <sub>2u</sub>                          | 183 | E <sub>u</sub>                           | 186 |
| B <sub>1g</sub>                        | 414 | E <sub>u</sub>                           | 181 | E <sub>g</sub>                           | 186 |
| A <sub>g</sub>                         | 380 | E <sub>u</sub>                           | 159 | E <sub>u</sub>                           | 162 |
| B <sub>1g</sub>                        | 365 | A <sub>2g</sub>                          | 144 | B <sub>1u</sub>                          | 155 |
| B <sub>3g</sub>                        | 303 | B <sub>1u</sub>                          | 139 | A <sub>2g</sub>                          | 150 |
| B <sub>3u</sub>                        | 271 | E <sub>u</sub>                           | 124 | E <sub>u</sub>                           | 118 |
| B <sub>1u</sub>                        | 240 | A <sub>2g</sub>                          | 69  | B <sub>1g</sub>                          | 95  |
| B <sub>3u</sub>                        | 205 | A <sub>2u</sub>                          | 67  | E <sub>g</sub>                           | 88  |
| A <sub>g</sub>                         | 201 | E <sub>u</sub>                           | 66  | A <sub>2u</sub>                          | 72  |
| B <sub>2g</sub>                        | 200 | E <sub>g</sub>                           | 65  | E <sub>u</sub>                           | 72  |
| B <sub>1u</sub>                        | 199 | E <sub>g</sub>                           | 26  | A <sub>2g</sub>                          | 65  |
| B <sub>2u</sub>                        | 186 | A <sub>2u</sub>                          | -1  | E <sub>g</sub>                           | 56  |
| B <sub>2g</sub>                        | 182 | E <sub>u</sub>                           | -2  | A <sub>2u</sub>                          | -5  |
| B <sub>1u</sub>                        | 175 | B <sub>1g</sub>                          | -39 | E <sub>u</sub>                           | -5  |
| B <sub>3u</sub>                        | 174 |                                          |     |                                          |     |
| A <sub>u</sub>                         | 174 |                                          |     |                                          |     |
| A <sub>u</sub>                         | 164 |                                          |     |                                          |     |
| B <sub>2u</sub>                        | 162 |                                          |     |                                          |     |
| B <sub>3u</sub>                        | 161 |                                          |     |                                          |     |
| B <sub>1u</sub>                        | 157 |                                          |     |                                          |     |
| B <sub>3g</sub>                        | 153 |                                          |     |                                          |     |
| B <sub>2u</sub>                        | 146 |                                          |     |                                          |     |
| A <sub>u</sub>                         | 146 |                                          |     |                                          |     |
| B <sub>1g</sub>                        | 139 |                                          |     |                                          |     |
| B <sub>1u</sub>                        | 139 |                                          |     |                                          |     |
| B <sub>3g</sub>                        | 134 |                                          |     |                                          |     |
| B <sub>3u</sub>                        | 134 |                                          |     |                                          |     |
| B <sub>3u</sub>                        | 129 |                                          |     |                                          |     |
| B <sub>2g</sub>                        | 125 |                                          |     |                                          |     |
| B <sub>1u</sub>                        | 118 |                                          |     |                                          |     |
| A <sub>g</sub>                         | 98  |                                          |     |                                          |     |
| A <sub>g</sub>                         | 87  |                                          |     |                                          |     |
| B <sub>1g</sub>                        | 86  |                                          |     |                                          |     |
| B <sub>1u</sub>                        | 82  |                                          |     |                                          |     |
| A <sub>g</sub>                         | 78  |                                          |     |                                          |     |
| B <sub>3g</sub>                        | 77  |                                          |     |                                          |     |
| A <sub>u</sub>                         | 76  |                                          |     |                                          |     |
| B <sub>3u</sub>                        | 76  |                                          |     |                                          |     |
| B <sub>2u</sub>                        | 74  |                                          |     |                                          |     |
| B <sub>2g</sub>                        | 73  |                                          |     |                                          |     |
| B <sub>2u</sub>                        | 71  |                                          |     |                                          |     |
| A <sub>g</sub>                         | 69  |                                          |     |                                          |     |
| B <sub>3u</sub>                        | 68  |                                          |     |                                          |     |
| B <sub>1u</sub>                        | 65  |                                          |     |                                          |     |
| A <sub>u</sub>                         | 64  |                                          |     |                                          |     |
| B <sub>2g</sub>                        | 60  |                                          |     |                                          |     |
| B <sub>1g</sub>                        | 50  |                                          |     |                                          |     |
| A <sub>u</sub>                         | 49  |                                          |     |                                          |     |
| B <sub>2g</sub>                        | 34  |                                          |     |                                          |     |
| A <sub>g</sub>                         | 33  |                                          |     |                                          |     |
| B <sub>2u</sub>                        | -1  |                                          |     |                                          |     |
| B <sub>1u</sub>                        | -1  |                                          |     |                                          |     |

Cif files of structures used in lattice dynamics calculations

### RbAgF<sub>3</sub> *Pnma* (HSE06)

```

data_findsym-output
_audit_creation_method FINDSYM

_cell_length_a 6.2633870000
_cell_length_b 8.3574660000
_cell_length_c 6.3444310000
_cell_angle_alpha 90.0000000000
_cell_angle_beta 90.0000000000
_cell_angle_gamma 90.0000000000
_cell_volume 332.1058636297

_symmetry_space_group_name_H-M "P 21/n 21/m 21/a"
_symmetry_Int_Tables_number 62
_space_group.reference_setting '062:-P 2ac 2n'
_space_group.transform_Pp_abc a,b,c;0,0,0

loop_
_space_group_symop_id
_space_group_symop_operation_xyz
1 x,y,z
2 x+1/2,-y+1/2,-z+1/2
3 -x,y+1/2,-z
4 -x+1/2,-y,z+1/2
5 -x,-y,-z
6 -x+1/2,y+1/2,z+1/2
7 x,-y+1/2,z
8 x+1/2,y,-z+1/2

loop_
_atom_site_label
_atom_site_type_symbol
_atom_site_symmetry_multiplicity
_atom_site_Wyckoff_label
_atom_site_fract_x
_atom_site_fract_y
_atom_site_fract_z
_atom_site_occupancy
_atom_site_fract_symmform
Ag1 Ag 4 a 0.00000 0.00000 0.00000 1.00000 0,0,0
Rb1 Rb 4 c 0.00381 0.25000 0.49913 1.00000 Dx,0,Dz
F1 F 4 c 0.49600 0.25000 0.45836 1.00000 Dx,0,Dz
F2 F 8 d 0.26645 -0.02118 0.27814 1.00000 Dx,Dy,Dz

```

### RbAgF<sub>3</sub> *I4/mcm* (HSE06)

```

data_findsym-output
_audit_creation_method FINDSYM

_cell_length_a 6.2963000000
_cell_length_b 6.2963000000
_cell_length_c 8.4031760000
_cell_angle_alpha 90.0000000000
_cell_angle_beta 90.0000000000
_cell_angle_gamma 90.0000000000
_cell_volume 333.1304144144

_symmetry_space_group_name_H-M "I 4/m 2/c 2/m"
_symmetry_Int_Tables_number 140
_space_group.reference_setting '140:-I 4 2c'
_space_group.transform_Pp_abc a,b,c;0,0,0

loop_
_space_group_symop_id
_space_group_symop_operation_xyz

```

1 x,y,z  
 2 x,-y,-z+1/2  
 3 -x,y,-z+1/2  
 4 -x,-y,z  
 5 -y,-x,-z+1/2  
 6 -y,x,z  
 7 y,-x,z  
 8 y,x,-z+1/2  
 9 -x,-y,-z  
 10 -x,y,z+1/2  
 11 x,-y,z+1/2  
 12 x,y,-z  
 13 y,x,z+1/2  
 14 y,-x,-z  
 15 -y,x,-z  
 16 -y,-x,z+1/2  
 17 x+1/2,y+1/2,z+1/2  
 18 x+1/2,-y+1/2,-z  
 19 -x+1/2,y+1/2,-z  
 20 -x+1/2,-y+1/2,z+1/2  
 21 -y+1/2,-x+1/2,-z  
 22 -y+1/2,x+1/2,z+1/2  
 23 y+1/2,-x+1/2,z+1/2  
 24 y+1/2,x+1/2,-z  
 25 -x+1/2,-y+1/2,-z+1/2  
 26 -x+1/2,y+1/2,z  
 27 x+1/2,-y+1/2,z  
 28 x+1/2,y+1/2,-z+1/2  
 29 y+1/2,x+1/2,z  
 30 y+1/2,-x+1/2,-z+1/2  
 31 -y+1/2,x+1/2,-z+1/2  
 32 -y+1/2,-x+1/2,z

loop\_  
 \_atom\_site\_label  
 \_atom\_site\_type\_symbol  
 \_atom\_site\_symmetry\_multiplicity  
 \_atom\_site\_Wyckoff\_label  
 \_atom\_site\_fract\_x  
 \_atom\_site\_fract\_y  
 \_atom\_site\_fract\_z  
 \_atom\_site\_occupancy  
 \_atom\_site\_fract\_symmform  
 Ag1 Ag 4 d 0.00000 0.50000 0.00000 1.00000 0,0,0  
 Rb1 Rb 4 a 0.00000 0.00000 0.25000 1.00000 0,0,0  
 F1 F 4 b 0.00000 0.50000 0.25000 1.00000 0,0,0  
 F2 F 8 h 0.22870 0.72870 0.00000 1.00000 Dx,Dx,0

### CsAgF<sub>3</sub> *I4/mcm* (HSE06)

data\_findsym-output  
 \_audit\_creation\_method FINDSYM  
  
 \_cell\_length\_a 6.4411370000  
 \_cell\_length\_b 6.4411370000  
 \_cell\_length\_c 8.4690630000  
 \_cell\_angle\_alpha 90.0000000000  
 \_cell\_angle\_beta 90.0000000000  
 \_cell\_angle\_gamma 90.0000000000  
 \_cell\_volume 351.3665678866  
  
 \_symmetry\_space\_group\_name H-M "I 4/m 2/c 2/m"  
 \_symmetry\_Int\_Tables\_number 140  
 \_space\_group.reference\_setting 'I 4 2c'  
 \_space\_group.transform\_Pp\_abc a,b,c;0,0,0

loop\_  
 \_space\_group\_symop\_id  
 \_space\_group\_symop\_operation\_xyz  
 1 x,y,z  
 2 x,-y,-z+1/2  
 3 -x,y,-z+1/2

4 -x,-y,z  
 5 -y,-x,-z+1/2  
 6 -y,x,z  
 7 y,-x,z  
 8 y,x,-z+1/2  
 9 -x,-y,-z  
 10 -x,y,z+1/2  
 11 x,-y,z+1/2  
 12 x,y,-z  
 13 y,x,z+1/2  
 14 y,-x,-z  
 15 -y,x,-z  
 16 -y,-x,z+1/2  
 17 x+1/2,y+1/2,z+1/2  
 18 x+1/2,-y+1/2,-z  
 19 -x+1/2,y+1/2,-z  
 20 -x+1/2,-y+1/2,z+1/2  
 21 -y+1/2,-x+1/2,-z  
 22 -y+1/2,x+1/2,z+1/2  
 23 y+1/2,-x+1/2,z+1/2  
 24 y+1/2,x+1/2,-z  
 25 -x+1/2,-y+1/2,-z+1/2  
 26 -x+1/2,y+1/2,z  
 27 x+1/2,-y+1/2,z  
 28 x+1/2,y+1/2,-z+1/2  
 29 y+1/2,x+1/2,z  
 30 y+1/2,-x+1/2,-z+1/2  
 31 -y+1/2,x+1/2,-z+1/2  
 32 -y+1/2,-x+1/2,z

loop\_  
 \_atom\_site\_label  
 \_atom\_site\_type\_symbol  
 \_atom\_site\_symmetry\_multiplicity  
 \_atom\_site\_Wyckoff\_label  
 \_atom\_site\_fract\_x  
 \_atom\_site\_fract\_y  
 \_atom\_site\_fract\_z  
 \_atom\_site\_occupancy  
 \_atom\_site\_fract\_symmform  
 Ag1 Ag 4 d 0.00000 0.50000 0.00000 1.00000 0,0,0  
 Cs1 Cs 4 a 0.00000 0.00000 0.25000 1.00000 0,0,0  
 F1 F 4 b 0.00000 0.50000 0.25000 1.00000 0,0,0  
 F2 F 8 h 0.22363 0.72363 0.00000 1.00000 Dx,Dx,0

### **Rb<sub>3</sub>Ag<sub>2</sub>F<sub>7</sub> *Cmca* (GGA+U)**

data\_findsym-output  
 \_audit\_creation\_method FINDSYM  
  
 \_cell\_length\_a 21.6756500000  
 \_cell\_length\_b 6.2943600000  
 \_cell\_length\_c 6.2937100000  
 \_cell\_angle\_alpha 90.0000000000  
 \_cell\_angle\_beta 90.0000000000  
 \_cell\_angle\_gamma 90.0000000000  
 \_cell\_volume 858.6781972783  
  
 \_symmetry\_space\_group\_name\_H-M "C 2/m 2/c 21/a"  
 \_symmetry\_Int\_Tables\_number 64  
 \_space\_group.reference\_setting '064:-C 2ac 2'  
 \_space\_group.transform\_Pp\_abc a,b,c;0,0,0

loop\_  
 \_space\_group\_symop\_id  
 \_space\_group\_symop\_operation\_xyz  
 1 x,y,z  
 2 x,-y,-z  
 3 -x+1/2,y,-z+1/2  
 4 -x+1/2,-y,z+1/2

5 -x,-y,-z  
6 -x,y,z  
7 x+1/2,-y,z+1/2  
8 x+1/2,y,-z+1/2  
9 x+1/2,y+1/2,z  
10 x+1/2,-y+1/2,-z  
11 -x,y+1/2,-z+1/2  
12 -x,-y+1/2,z+1/2  
13 -x+1/2,-y+1/2,-z  
14 -x+1/2,y+1/2,z  
15 x,-y+1/2,z+1/2  
16 x,y+1/2,-z+1/2

loop\_

\_atom\_site\_label

\_atom\_site\_type\_symbol

\_atom\_site\_symmetry\_multiplicity

\_atom\_site\_Wyckoff\_label

\_atom\_site\_fract\_x

\_atom\_site\_fract\_y

\_atom\_site\_fract\_z

\_atom\_site\_occupancy

\_atom\_site\_fract\_symmform

Ag1 Ag 8 d 0.40284 0.00000 0.00000 1.00000 Dx,0,0  
Rb1 Rb 8 d 0.18085 0.00000 0.00000 1.00000 Dx,0,0  
Rb2 Rb 4 a 0.00000 0.00000 0.00000 1.00000 0,0,0  
F1 F 8 d 0.30625 0.00000 0.00000 1.00000 Dx,0,0  
F2 F 4 b 0.50000 0.00000 0.00000 1.00000 0,0,0  
F3 F 16 g 0.09527 0.26940 0.23077 1.00000 Dx,Dy,Dz
